# Supplementary material
Source: HighWire-hosted journal article supplement (doi:10.1101/rna.059915.116)
Supplement: Supplemental_FigLegends.docx [file Supplemental_FigLegends.docx]

**Supplemental Figure S1. Transgenic expression of Helicase and CdsRBD Dicer-2 does not have dominant negative effects on the RNA silencing activity in flies.**

(A) Images of the eyes of the female wild-type and mutant Dicer-2 rescue transgenic flies in the background of the endogenous *dicer-2null* or the endogenous wild-type *dicer-2* in the presence of *white* inverted repeat (*w*IR).

(B) Measurement of eye pigment chemically extracted from hand-dissected fly eyes. 480 nm absorbance normalized to mean of CantonS samples was shown. Data are mean +/- S.D (n=5). P-value < 0.05 is indicated by *.

**Supplemental Figure S2. Helicase and CdsRBD flies show no change in miRNA abundance and length**

(A) Scatter plots showing normalized number of reads of each miRNAs. Each dot represents unique miRNA. miRNAs with more than 200 reads per million reads in either of the libraries were analyzed.

(B) Scatter plots showing mean length of each miRNAs. Each dot represents unique miRNA. miRNAs with more than 200 reads per million reads in either of the libraries were analyzed.
